# Supplementary material for: CD244+ polymorphonuclear myeloid-derived suppressor cells reflect the status of peritoneal dissemination in a colon cancer mouse model
Source: PubMed Central journal article supplement — Oncol Rep. 2021 Apr 19;45(6):106. doi: 10.3892/or.2021.8057 (PMC8072829; doi:10.3892/or.2021.8057), 2021-04-19
Supplement: Supplementary_Data.pdf [file Supplementary_Data.pdf]

Table SI. Final PD score of the peritoneal dissemination model for immune cell analysis (on Days 6, 13, 20).

| Cell line used | PD Score <sup>a</sup> |    |    |    |
|----------------|-----------------------|----|----|----|
|                | P0                    | P1 | P2 | P3 |
| MC38 (n=18)    |                       |    |    |    |
| Day 6          | 4                     | 2  | 0  | 0  |
| Day 13         | 1                     | 1  | 2  | 2  |
| Day 20         | 0                     | 0  | 3  | 3  |
| CT26 (n=12)    |                       |    |    |    |
| Day 6          | 0                     | 2  | 1  | 1  |
| Day 13         | 0                     | 0  | 1  | 3  |
| Day 20         | 0                     | 0  | 0  | 4  |

<sup>a</sup>PD score: P0 for no nodules, P1 for 1-3 nodules, P2 for 4-9 nodules, and P3 for 10 or more nodules. PD, peritoneal dissemination.

Table SII. Final tumor volume of the subcutaneous inoculated mice for immune cell analysis (on Days 6, 13, 20) and survival analysis.

| Day                                  | Maximum diameter (mm) | Minimum diameter (mm) | V (mm <sup>3</sup> ) <sup>b</sup> |
|--------------------------------------|-----------------------|-----------------------|-----------------------------------|
| Day 6 (n=6) <sup>a</sup>             | 4.4±1.4               | 3.6±1.0               | 34.3±26.2                         |
| Day 13 (n=6) <sup>a</sup>            | 7.1±1.5               | 5.5±0.8               | 114.6±47.8                        |
| Day 20 (n=6) <sup>a</sup>            | 11.1±1.9              | 9.3±1.4               | 508.6±216.8                       |
| Survival analysis (n=6) <sup>a</sup> | 22.2±1.5              | 19.1±1.4              | 4,084.4±845.2                     |

<sup>a</sup>Data are expressed as the average ± SD. <sup>b</sup>Tumor volume (V)=maximum diameter x (minimum diameter)<sup>2</sup>/2.
